# Supplementary material
Source: publisher figshare collection journal article supplement (https://acs.figshare.com/ndownloader/files/17509832)
Supplement: Supplementary file 1 [file 17509832]

# **Precise Wettability Characterization of Carbonate Rocks to Evaluate Oil Recovery Using Surfactant-based Nanofluids**

Foad Haeri and Dandina N. Rao

Craft and Hawkins Department of Petroleum Engineering, Louisiana State University, 3207 Patrick F. Taylor Hall, Baton Rouge, LA 70803

## **Supporting Information**

Details of all the coreflood experiments of this study, including the core parameters, experimental conditions, oil recovery and pressure drop history-match, and relative permeability curves.

**Table 1.** Initial parameters for waterflood using brine (2 wt.% NaCl) at 500 psi and 72 °F.

|                       |                             |        |
|-----------------------|-----------------------------|--------|
| <b>Core name:</b>     | Indiana Limestone-10 (12X2) |        |
| <b>Porosity:</b>      | 18.14                       | %      |
| <b>Abs. Perm:</b>     | 23.59                       | md     |
| <b>Pore Volume</b>    | 112                         | cc     |
| <b>Oil</b>            | Yates crude oil             |        |
| <b>Brine (NaCl)</b>   | 2%                          | wt     |
| <b>Injection rate</b> | 2                           | cc/min |
| <b>Oil Recovery</b>   | 20.43                       | %      |

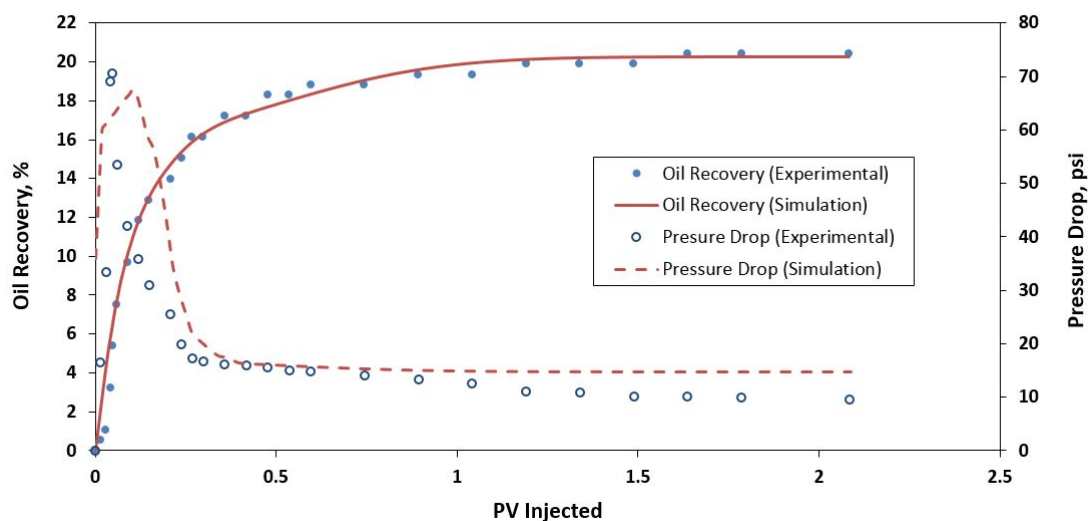

**Figure 1.** History match of oil recovery and pressure drop for waterflood (2 wt.% NaCl) at 500 psi and 72 °F.

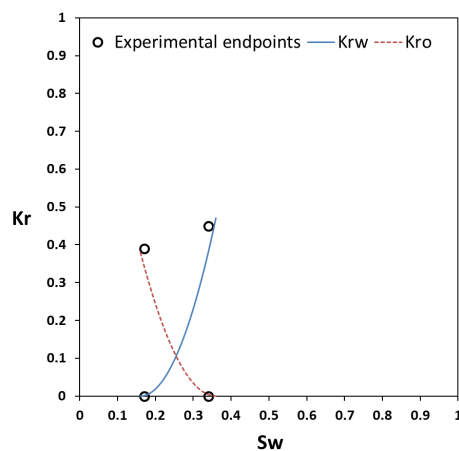

**Figure 2.** Relative permeability curves for waterflood (2 wt.% NaCl) at 500 psi and 72 °F.

**Table 2.** Initial parameters for coreflood using surfactant (ALF 13S, 2000 ppm) at 500 psi and 72 °F.

|                       |                             |
|-----------------------|-----------------------------|
| <b>Core name:</b>     | Indiana Limestone-15 (12X2) |
| <b>Porosity:</b>      | 16.03 %                     |
| <b>Abs. Perm:</b>     | 26.24 md                    |
| <b>Pore Volume</b>    | 99 cc                       |
| <b>Oil</b>            | Yates crude oil             |
| <b>Brine (NaCl)</b>   | 2% wt                       |
| <b>Surfactant</b>     | ALF 13S (2000 ppm)          |
| <b>Injection rate</b> | 2 cc/min                    |
| <b>Oil Recovery</b>   | 20.73 %                     |

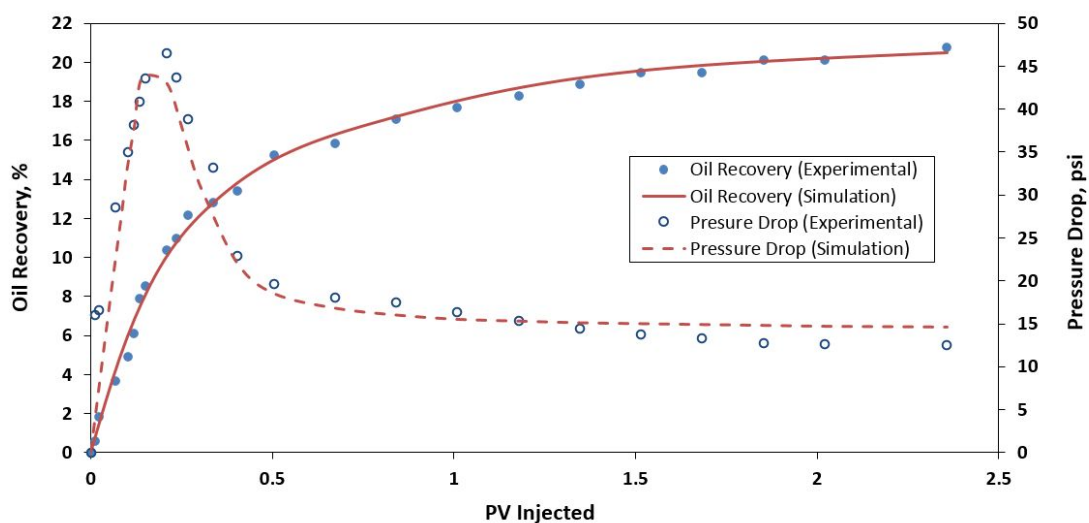

**Figure 3.** History match of oil recovery and pressure drop using surfactant (ALF 13S, 2000 ppm) at 500 psi and 72 °F.

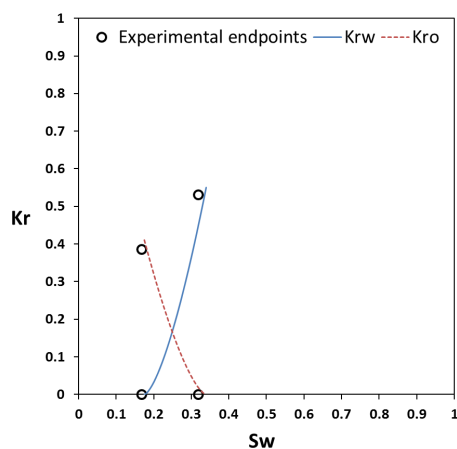

**Figure 4.** Relative permeability curves for coreflood using surfactant (ALF 13S, 2000 ppm) at 500 psi and 72 °F.

**Table 3.** Initial parameters for coreflood using brine-based nanofluid (0.4 wt.% NP in 2% NaCl) at 500 psi and 72 °F.

|                         |                             |
|-------------------------|-----------------------------|
| Core name:              | Indiana Limestone-14 (12X2) |
| Porosity:               | 14.73 %                     |
| Abs. Perm:              | 18.59 md                    |
| Pore Volume             | 91 cc                       |
| Oil                     | Yates crude oil             |
| Brine (NaCl)            | 2% wt                       |
| Nanofluid (brine-based) | 0.4 wt.% NP                 |
| Injection rate          | 2 cc/min                    |
| Oil Recovery            | 30.51 %                     |

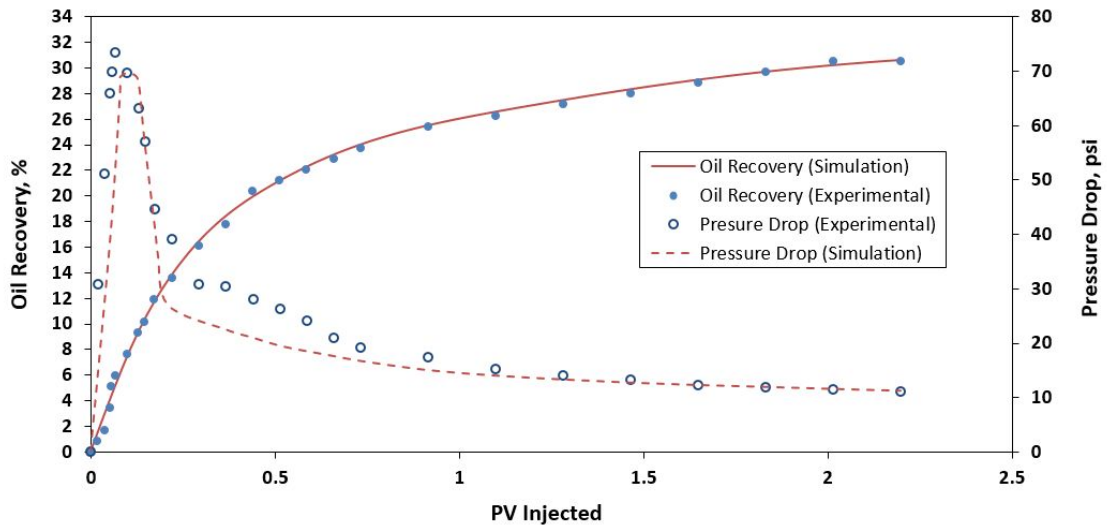

**Figure 5.** History match of oil recovery and pressure drop using brine-based nanofluid (0.4 wt.% NP in 2% NaCl) at 500 psi and 72 °F.

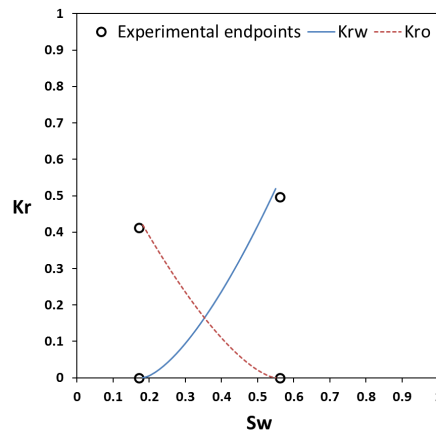

**Figure 6.** Relative permeability curves for coreflood using brine-based nanofluid (0.4 wt.% NP in 2% NaCl) at 500 psi and 72 °F.

**Table 4.** Initial parameters for coreflood using surfactant-based nanofluid (0.4 wt.% NP + ALF 13S, 2000 ppm) at 500 psi and 72 °F.

|                              |                                  |        |
|------------------------------|----------------------------------|--------|
| Core name:                   | Indiana Limestone-16 (12X2)      |        |
| Porosity:                    | 16.52                            | %      |
| Abs. Perm:                   | 8.49                             | md     |
| Pore Volume                  | 102                              | cc     |
| Oil                          | Yates crude oil                  |        |
| Brine (NaCl)                 | 2%                               | wt     |
| Nanofluid (surfactant-based) | 0.4 wt.% NP + ALF 13S (2000 ppm) |        |
| Injection rate               | 2                                | cc/min |
| Oil Recovery                 | 57.33                            | %      |

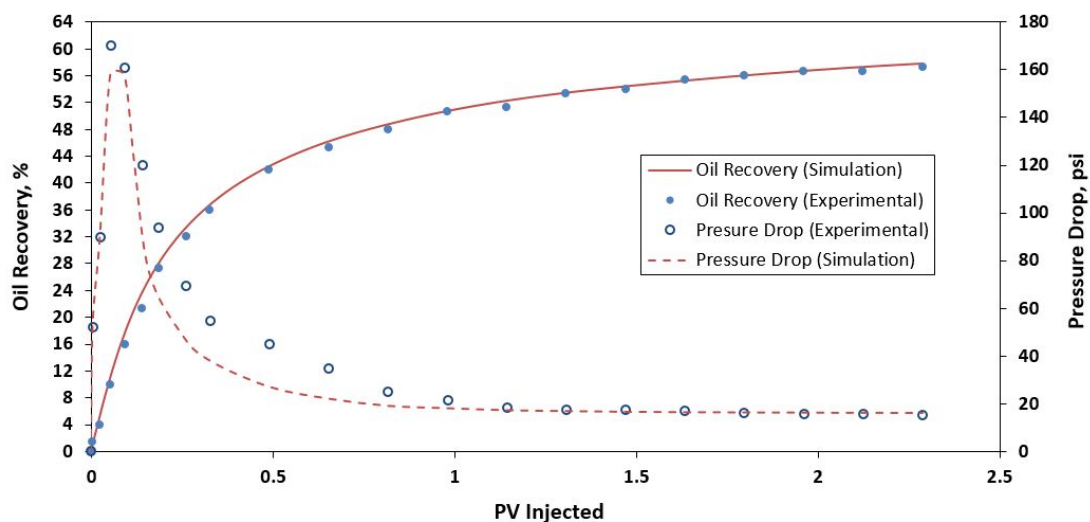

**Figure 7.** History match of oil recovery and pressure drop using surfactant-based nanofluid (0.4 wt.% NP + ALF 13S, 2000 ppm) at 500 psi and 72.

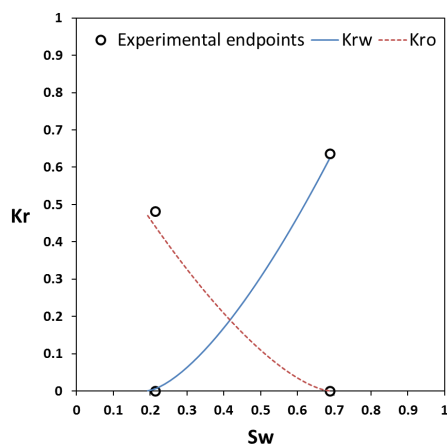

**Figure 8.** Relative permeability curves for coreflood using surfactant-based nanofluid (0.4 wt.% NP + ALF 13S, 2000 ppm) at 500 psi and 72 °F.

**Table 5.** Initial parameters for coreflood using surfactant-based nanofluid (0.4 wt.% NP + ALF 13S, 1000 ppm) at 500 psi and 72 °F.

|                              |                                  |
|------------------------------|----------------------------------|
| Core name:                   | Indiana Limestone-17 (12X2)      |
| Porosity:                    | 17.17 %                          |
| Abs. Perm:                   | 15.81 md                         |
| Pore Volume                  | 106 cc                           |
| Oil                          | Yates crude oil                  |
| Brine (NaCl)                 | 2% wt                            |
| Nanofluid (surfactant-based) | 0.4 wt.% NP + ALF 13S (1000 ppm) |
| Injection rate               | 2 cc/min                         |
| Oil Recovery                 | 52.63 %                          |

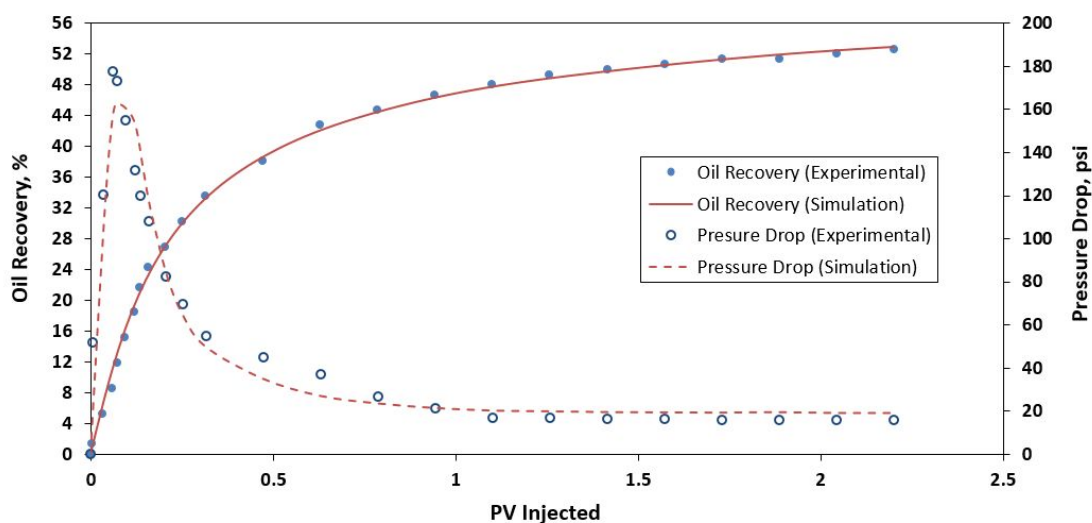

**Figure 9.** History match of oil recovery and pressure drop using surfactant-based nanofluid (0.4 wt.% NP + ALF 13S, 1000 ppm) at 500 psi and 72.

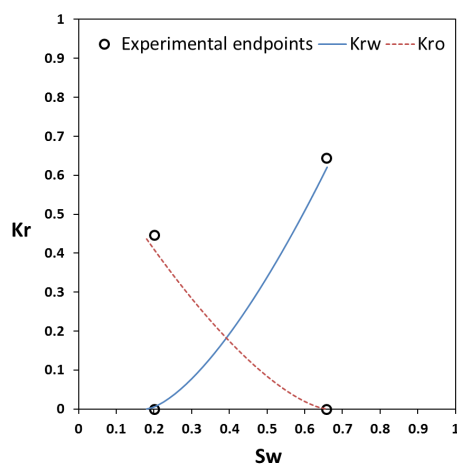

**Figure 10.** Relative permeability curves for coreflood using surfactant-based nanofluid (0.4 wt.% NP + ALF 13S, 1000 ppm) at 500 psi and 72 °F.

**Table 6.** Initial parameters for coreflood using surfactant (ALF 9S, 2000 ppm) at 500 psi and 72 °F.

|                |                            |        |
|----------------|----------------------------|--------|
| Core name:     | Indiana Limestone-X (12X2) |        |
| Porosity:      | 16.36                      | %      |
| Abs. Perm:     | 17.95                      | md     |
| Pore Volume    | 101                        | cc     |
| Oil            | Yates crude oil            |        |
| Brine (NaCl)   | 2%                         | wt     |
| Surfactant     | ALF 9S (2000 ppm)          |        |
| Injection rate | 2                          | cc/min |
| Oil Recovery   | 48.19                      | %      |

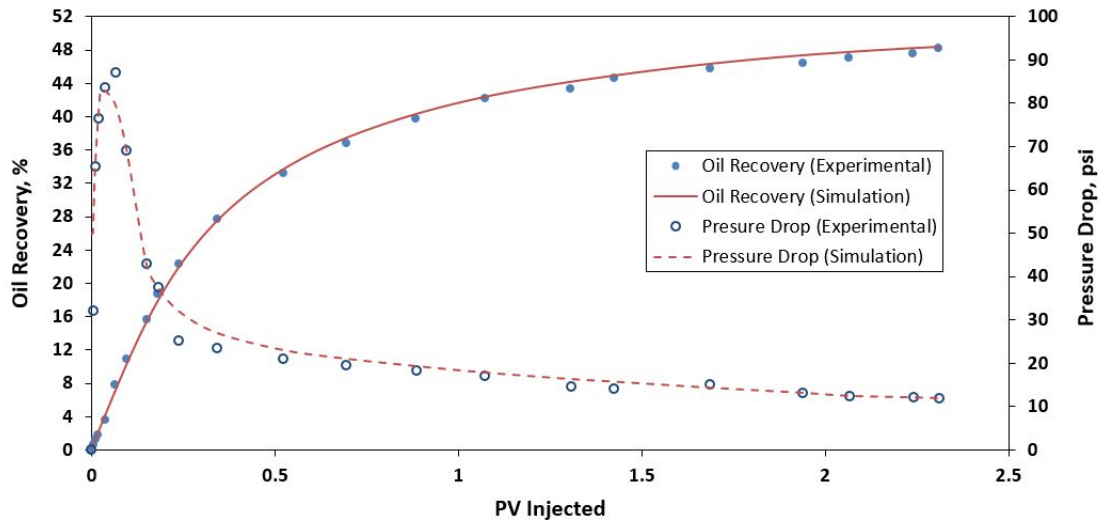

**Figure 11.** History match of oil recovery and pressure drop using surfactant (ALF 9S, 2000 ppm) at 500 psi and 72 °F.

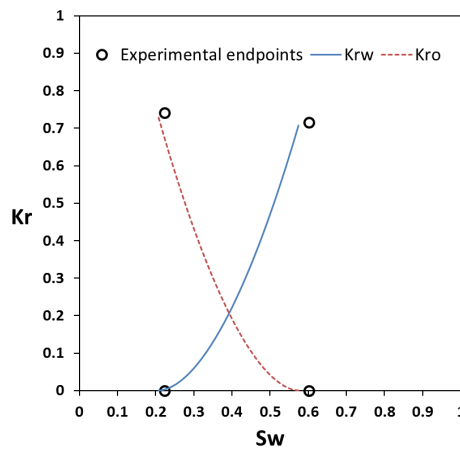

**Figure 12.** Relative permeability curves for coreflood using surfactant (ALF 9S, 2000 ppm) at 500 psi and 72 °F.

**Table 7.** Initial parameters for coreflood using surfactant-based nanofluid (0.4 wt.% NP+ALF 9S, 2000 ppm) at 500 psi and 72 °F.

|                              |                                 |        |
|------------------------------|---------------------------------|--------|
| Core name:                   | Indiana Limestone-X (12X2)      |        |
| Porosity:                    | 16.36                           | %      |
| Abs. Perm:                   | 17.95                           | md     |
| Pore Volume                  | 101                             | cc     |
| Oil                          | Yates crude oil                 |        |
| Brine (NaCl)                 | 2%                              | wt     |
| Nanofluid (surfactant-based) | 0.4 wt.% NP + ALF 9S (2000 ppm) |        |
| Injection rate               | 2                               | cc/min |
| Oil Recovery                 | 92.68                           | %      |

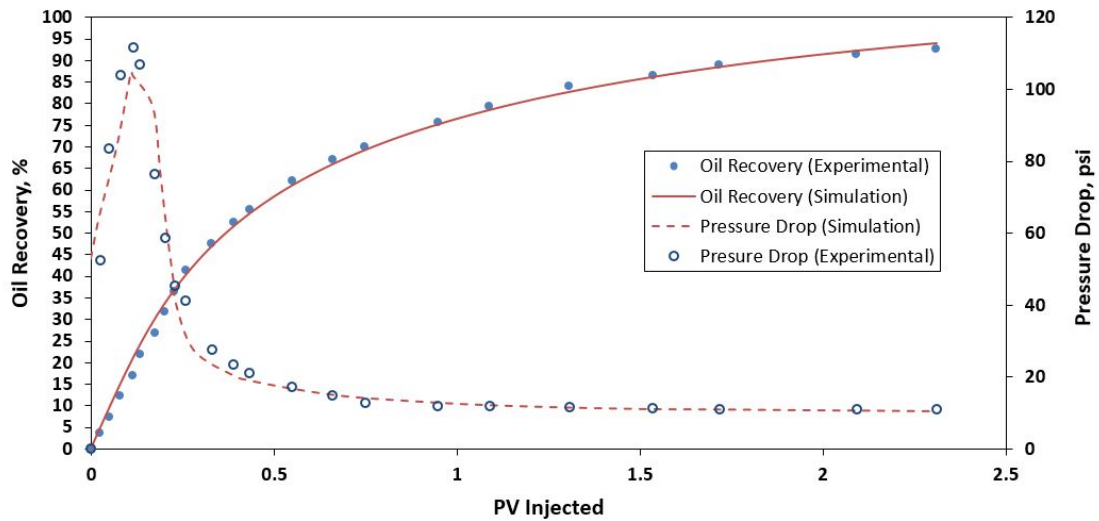

**Figure 13.** History match of oil recovery and pressure drop using surfactant-based nanofluid (0.4 wt.% NP+ALF 9S, 2000 ppm) at 500 psi and 72 °F.

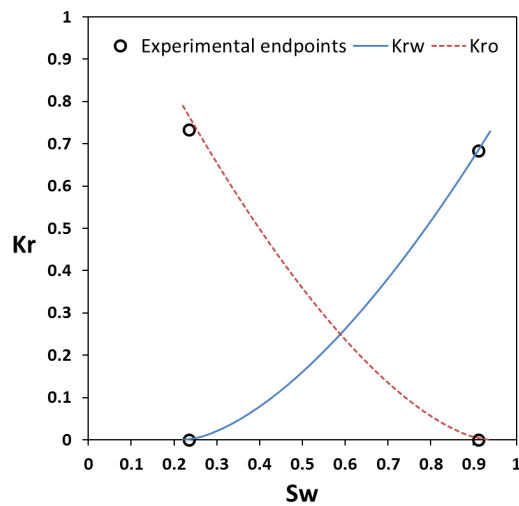

**Figure 14.** Relative permeability curves for coreflood using surfactant-based nanofluid (0.4 wt.% NP+ALF 9S, 2000 ppm) at 500 psi and 72 °F.



**Table 8.** Initial parameters for coreflood using surfactant-based nanofluid (0.4 wt.% NP+ALF 9S, 1000 ppm) at 500 psi and 72 °F.

|                              |                                 |        |
|------------------------------|---------------------------------|--------|
| Core name:                   | Indiana Limestone-X (12X2)      |        |
| Porosity:                    | 16.36                           | %      |
| Abs. Perm:                   | 17.95                           | md     |
| Pore Volume                  | 101                             | cc     |
| Oil                          | Yates crude oil                 |        |
| Brine (NaCl)                 | 2%                              | wt     |
| Nanofluid (surfactant-based) | 0.4 wt.% NP + ALF 9S (1000 ppm) |        |
| Injection rate               | 2                               | cc/min |
| Oil Recovery                 | 86.25                           | %      |

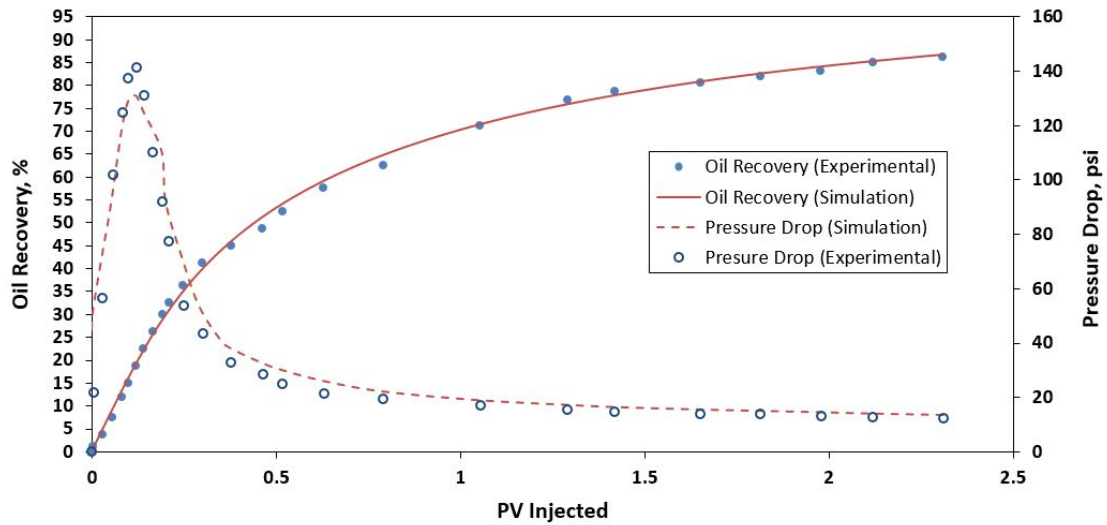

**Figure 15.** History match of oil recovery and pressure drop using surfactant-based nanofluid (0.4 wt.% NP+ALF 9S, 1000 ppm) at 500 psi and 72 °F.

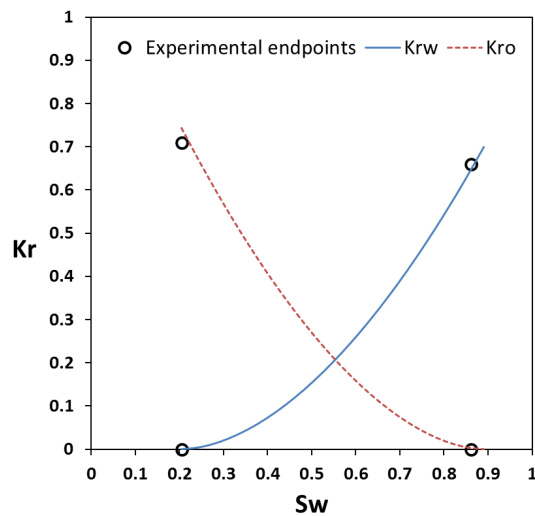

**Figure 16.** Relative permeability curves for coreflood using surfactant-based nanofluid (0.4 wt.% NP+ALF 9S, 1000 ppm) at 500 psi and 72 °F.

**Table 9.** Initial parameters for waterflood using brine (2 wt.% NaCl) at reservoir conditions (700 psi & 150 °F).

|                       |                             |        |
|-----------------------|-----------------------------|--------|
| <b>Core name:</b>     | Indiana Limestone-12 (12X2) |        |
| <b>Porosity:</b>      | 16.35                       | %      |
| <b>Abs. Perm:</b>     | 14.87                       | md     |
| <b>Pore Volume</b>    | 101                         | cc     |
| <b>Oil</b>            | Yates crude oil             |        |
| <b>Brine (NaCl)</b>   | 2%                          | wt     |
| <b>Injection rate</b> | 2                           | cc/min |
| <b>Oil Recovery</b>   | 17.5                        | %      |

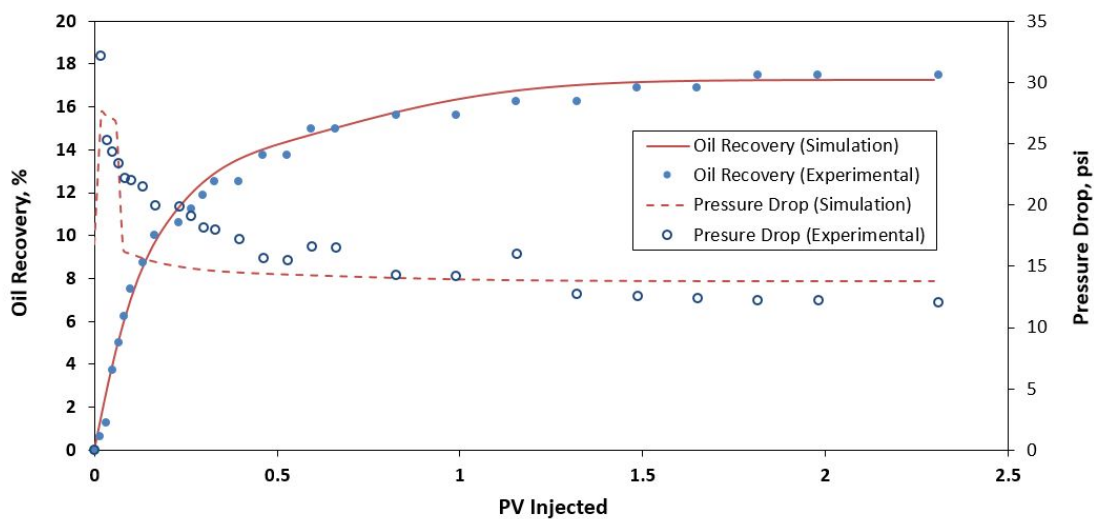

**Figure 17.** History match of oil recovery and pressure drop for waterflood (2 wt.% NaCl) at reservoir conditions.

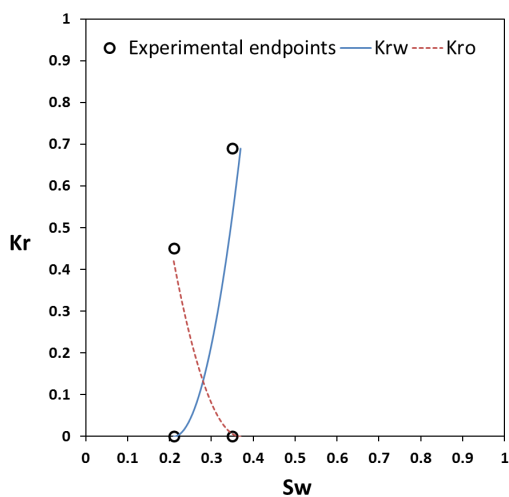

**Figure 18.** Relative permeability curves for waterflood (2 wt.% NaCl) at reservoir conditions (700 psi & 150 °F).

**Table 10.** Initial parameters for coreflood using surfactant (SOL 938, 2000 ppm) at reservoir conditions (700 psi & 150 °F).

|                |                             |        |
|----------------|-----------------------------|--------|
| Core name:     | Indiana Limestone-18 (12X2) |        |
| Porosity:      | 15.71                       | %      |
| Abs. Perm:     | 24.92                       | md     |
| Pore Volume    | 97                          | cc     |
| Oil            | Yates crude oil             |        |
| Brine (NaCl)   | 2%                          | wt     |
| Surfactant     | SOL 938 (2000 ppm)          |        |
| Injection rate | 2                           | cc/min |
| Oil Recovery   | 21.52                       | %      |

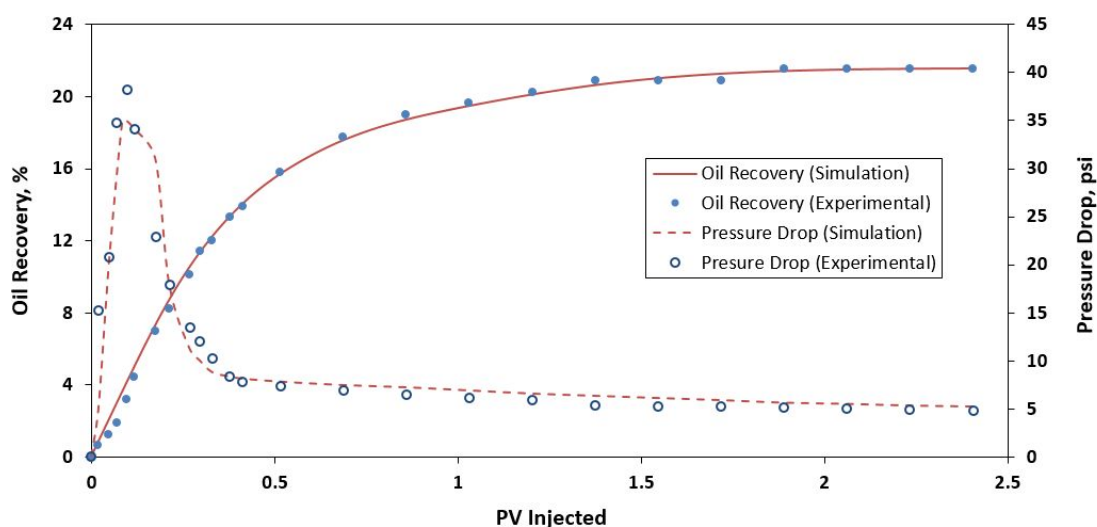

**Figure 19.** History match of oil recovery and pressure drop using surfactant (SOL 938, 2000 ppm) at reservoir conditions (700 psi & 150 °F).

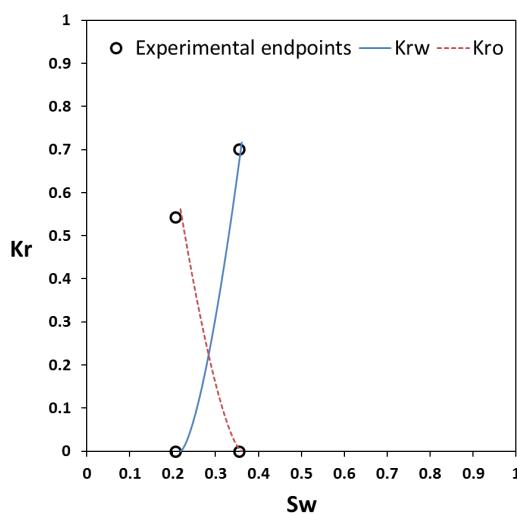

**Figure 20.** Relative permeability curves for coreflood using surfactant (SOL 938, 2000 ppm) at reservoir conditions (700 psi & 150 °F).

**Table 11.** Initial parameters for coreflood using brine-based nanofluid (0.4 wt.% NP in 2% NaCl) at reservoir conditions (700 psi & 150 °F).

|                         |                             |
|-------------------------|-----------------------------|
| Core name:              | Indiana Limestone-19 (12X2) |
| Porosity:               | 17.00 %                     |
| Abs. Perm:              | 31.29 md                    |
| Pore Volume             | 105 cc                      |
| Oil                     | Yates crude oil             |
| Brine (NaCl)            | 2% wt                       |
| Nanofluid (brine-based) | 0.4 wt.% NP                 |
| Injection rate          | 2 cc/min                    |
| Oil Recovery            | 28.57 %                     |

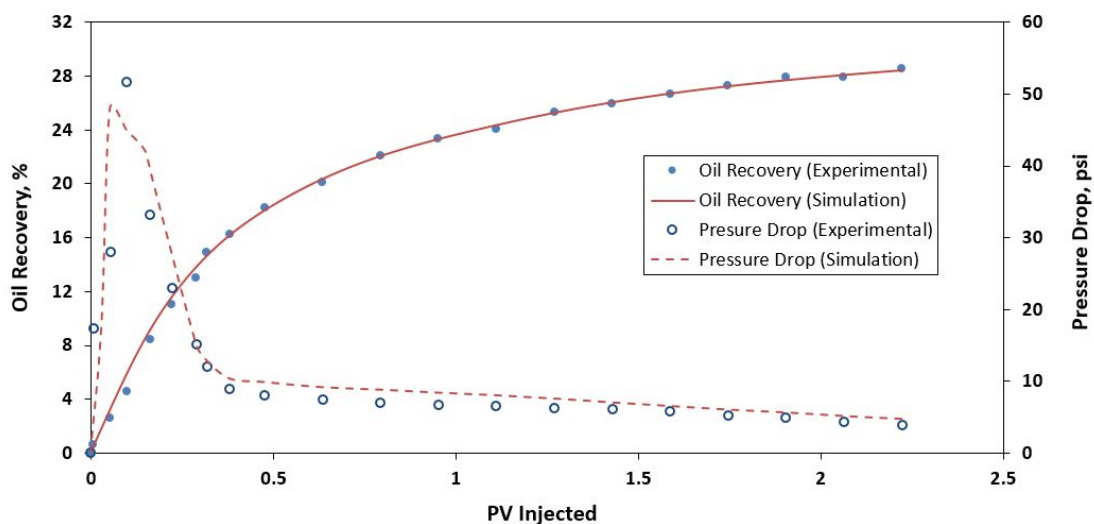

**Figure 21.** History match of oil recovery and pressure drop using brine-based nanofluid (0.4 wt.% NP in 2% NaCl) at reservoir conditions (700 psi & 150 °F).

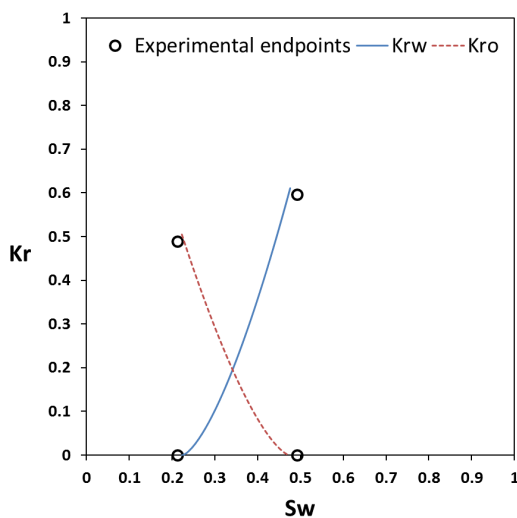

**Figure 22.** Relative permeability curves for coreflood using brine-based nanofluid ((0.4 wt.% NP in 2% NaCl) at reservoir conditions (700 psi & 150 °F).

**Table 12.** Initial parameters for coreflood using surfactant-based nanofluid (0.4 wt.% NP + SOL 938, 2000 ppm) at reservoir conditions (700 psi & 150 °F).

|                              |                                  |
|------------------------------|----------------------------------|
| Core name:                   | Indiana Limestone-20 (12X2)      |
| Porosity:                    | 15.06 %                          |
| Abs. Perm:                   | 49.70 md                         |
| Pore Volume                  | 93 cc                            |
| Oil                          | Yates crude oil                  |
| Brine (NaCl)                 | 2% wt                            |
| Nanofluid (surfactant-based) | 0.4 wt.% NP + SOL 938 (2000 ppm) |
| Injection rate               | 2 cc/min                         |
| Oil Recovery                 | 51.56 %                          |

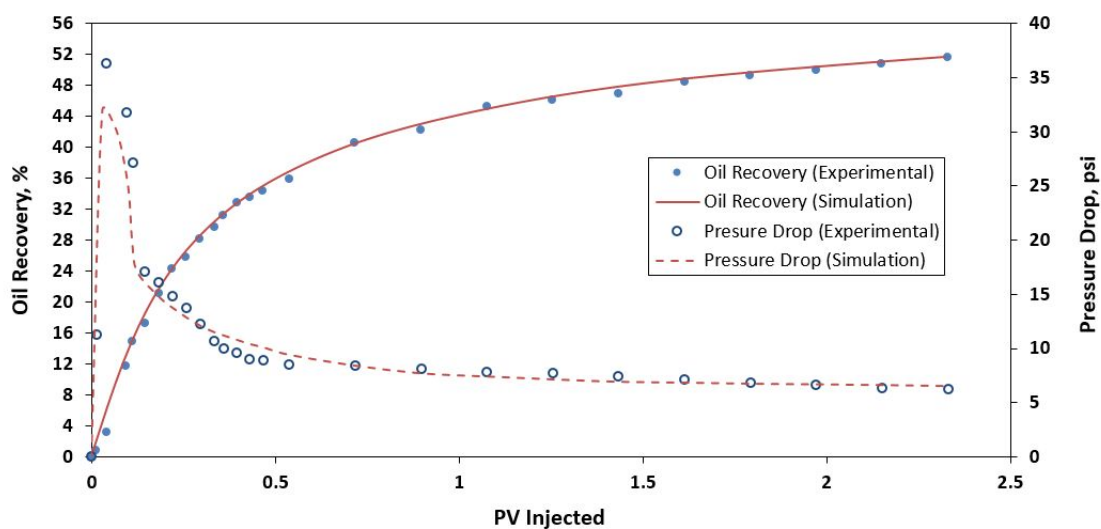

**Figure 23.** History match of oil recovery and pressure drop using surfactant-based nanofluid (0.4 wt.% NP + SOL 938, 2000 ppm) at reservoir conditions (700 psi & 150 °F).

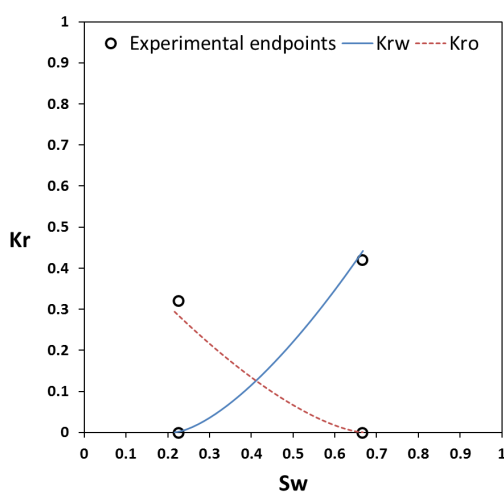

**Figure 24.** Relative permeability curves for coreflood using surfactant-based nanofluid (0.4 wt.% NP + SOL 938, 2000 ppm) at reservoir conditions (700 psi & 150 °F).

**Table 13.** Initial parameters for coreflood using surfactant-based nanofluid (0.4 wt.% NP + SOL 938, 1000 ppm) at reservoir conditions (700 psi & 150 °F).

|                              |                                  |
|------------------------------|----------------------------------|
| Core name:                   | Indiana Limestone-21 (12X2)      |
| Porosity:                    | 17.17 %                          |
| Abs. Perm:                   | 62.77 md                         |
| Pore Volume                  | 106 cc                           |
| Oil                          | Yates crude oil                  |
| Brine (NaCl)                 | 2% wt                            |
| Nanofluid (surfactant-based) | 0.4 wt.% NP + SOL 938 (1000 ppm) |
| Injection rate               | 2 cc/min                         |
| Oil Recovery                 | 45.07 %                          |

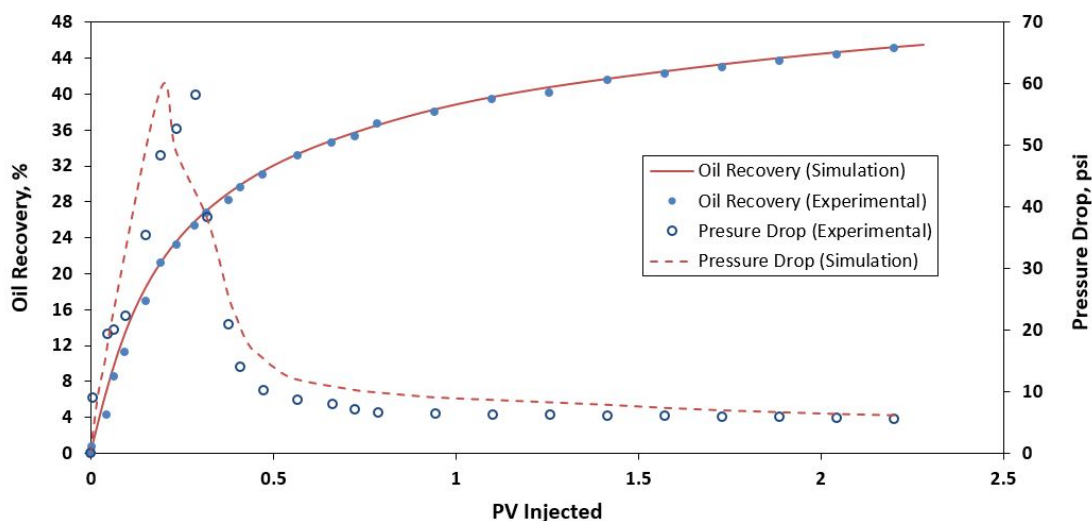

**Figure 25.** History match of oil recovery and pressure drop using surfactant-based nanofluid (0.4 wt.% NP + SOL 938, 1000 ppm) at reservoir conditions (700 psi & 150 °F).

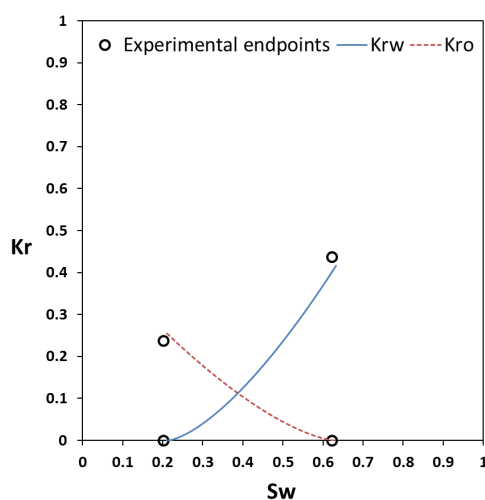

**Figure 26.** Relative permeability curves for coreflood using surfactant-based nanofluid (0.4 wt.% NP + SOL 938, 1000 ppm) at reservoir conditions (700 psi & 150 °F).
